# Supplementary material for: Validation of a deep learning system for the detection of diabetic retinopathy in Indigenous Australians
Source: PubMed Central journal article supplement (PMC10850716; doi:10.1136/bjo-2022-322237), 2023-02-06
Supplement: bjo-2022-322237supp001.pdf [file bjo-2022-322237supp001.pdf]

## Online-only Supplementary Material

Appendix A: STARD Checklist

Appendix B: Gradability Instructions and Examples

Appendix C: Confusion Matrices

## Appendix A: STARD Checklist

| Section & Topic          | No         | Item                                                                                                                                                   | Reported page # |
|--------------------------|------------|--------------------------------------------------------------------------------------------------------------------------------------------------------|-----------------|
| <b>TITLE OR ABSTRACT</b> |            |                                                                                                                                                        |                 |
|                          | <b>1</b>   | Identification as a study of diagnostic accuracy using at least one measure of accuracy (such as sensitivity, specificity, predictive values, or AUC)  | 3               |
| <b>ABSTRACT</b>          |            |                                                                                                                                                        |                 |
|                          | <b>2</b>   | Structured summary of study design, methods, results, and conclusions (for specific guidance, see STARD for Abstracts)                                 | 3               |
| <b>INTRODUCTION</b>      |            |                                                                                                                                                        |                 |
|                          | <b>3</b>   | Scientific and clinical background, including the intended use and clinical role of the index test                                                     | 6               |
|                          | <b>4</b>   | Study objectives and hypotheses                                                                                                                        | 6               |
| <b>METHODS</b>           |            |                                                                                                                                                        |                 |
| <i>Study design</i>      | <b>5</b>   | Whether data collection was planned before the index test and reference standard were performed (prospective study) or after (retrospective study)     | 8               |
| <i>Participants</i>      | <b>6</b>   | Eligibility criteria                                                                                                                                   | 9               |
|                          | <b>7</b>   | On what basis potentially eligible participants were identified (such as symptoms, results from previous tests, inclusion in registry)                 | 9               |
|                          | <b>8</b>   | Where and when potentially eligible participants were identified (setting, location and dates)                                                         | 9               |
|                          | <b>9</b>   | Whether participants formed a consecutive, random or convenience series                                                                                | 9               |
| <i>Test methods</i>      | <b>10a</b> | Index test, in sufficient detail to allow replication                                                                                                  | 9               |
|                          | <b>10b</b> | Reference standard, in sufficient detail to allow replication                                                                                          | 9               |
|                          | <b>11</b>  | Rationale for choosing the reference standard (if alternatives exist)                                                                                  | 9               |
|                          | <b>12a</b> | Definition of and rationale for test positivity cut-offs or result categories of the index test, distinguishing pre-specified from exploratory         | 9               |
|                          | <b>12b</b> | Definition of and rationale for test positivity cut-offs or result categories of the reference standard, distinguishing pre-specified from exploratory | N/A             |
|                          | <b>13a</b> | Whether clinical information and reference standard results were available to the performers/readers of the index test                                 | N/A             |
|                          | <b>13b</b> | Whether clinical information and index test results were available to the assessors of the reference standard                                          | 9               |
| <i>Analysis</i>          | <b>14</b>  | Methods for estimating or comparing measures of diagnostic accuracy                                                                                    | 10              |
|                          | <b>15</b>  | How indeterminate index test or reference standard results were handled                                                                                | 10              |
|                          | <b>16</b>  | How missing data on the index test and reference standard were handled                                                                                 | 10              |
|                          | <b>17</b>  | Any analyses of variability in diagnostic accuracy, distinguishing pre-specified from exploratory                                                      | N/A             |
|                          | <b>18</b>  | Intended sample size and how it was determined                                                                                                         | 10              |
| <b>RESULTS</b>           |            |                                                                                                                                                        |                 |
| <i>Participants</i>      | <b>19</b>  | Flow of participants, using a diagram                                                                                                                  | Figure 1        |
|                          | <b>20</b>  | Baseline demographic and clinical characteristics of participants                                                                                      | Table 1         |
|                          | <b>21a</b> | Distribution of severity of disease in those with the target condition                                                                                 | Table 1         |
|                          | <b>21b</b> | Distribution of alternative diagnoses in those without the target condition                                                                            | N/A             |
|                          | <b>22</b>  | Time interval and any clinical interventions between index test and reference standard                                                                 | N/A             |
| <i>Test results</i>      | <b>23</b>  | Cross tabulation of the index test results (or their distribution) by the results of the reference standard                                            | Appendix        |
|                          | <b>24</b>  | Estimates of diagnostic accuracy and their precision (such as 95% confidence intervals)                                                                | Table 2         |
|                          | <b>25</b>  | Any adverse events from performing the index test or the reference standard                                                                            | N/A             |
| <b>DISCUSSION</b>        |            |                                                                                                                                                        |                 |
|                          | <b>26</b>  | Study limitations, including sources of potential bias, statistical uncertainty, and generalisability                                                  | 16              |
|                          | <b>27</b>  | Implications for practice, including the intended use and clinical role of the index test                                                              | 17              |
| <b>OTHER INFORMATION</b> |            |                                                                                                                                                        |                 |
|                          | <b>28</b>  | Registration number and name of registry                                                                                                               | N/A             |
|                          | <b>29</b>  | Where the full study protocol can be accessed                                                                                                          | N/A             |
|                          | <b>30</b>  | Sources of funding and other support; role of funders                                                                                                  | 18              |

## Appendix B: Gradability Instructions and Examples

### DR Gradability

How gradable is the image for DR? Note: This question doesn't show if "Other" was selected as Fundus field. Also, "Gradable" and "Gradable with Difficulty" were both considered as gradable images.

|                          |                                                                                                                                                                                                                                                                                                                                                                                                                                  |
|--------------------------|----------------------------------------------------------------------------------------------------------------------------------------------------------------------------------------------------------------------------------------------------------------------------------------------------------------------------------------------------------------------------------------------------------------------------------|
| Gradable                 | <ul style="list-style-type: none"> <li>You can clearly see the features of DR in regions you'd expect to see in a given fundus field. This does not mean that you can confidently make a full diagnosis for DR with just this image.</li> </ul>                                                                                                                                                                                  |
| Gradable with Difficulty | <ul style="list-style-type: none"> <li>Images show key regions for the defined field of view, but image quality is not good enough to allow for a confident grading</li> <li>Some key regions may be blurry or missing, but clearly visible regions show obvious pathology/features which point to at least moderate DR</li> <li>If visible regions don't show any pathology, then the image is "ungradable" as below</li> </ul> |
| Ungradable               | <ul style="list-style-type: none"> <li>Images don't show key regions with good enough quality for a confident grading. Also the other visible areas do not show any obvious pathology</li> </ul>                                                                                                                                                                                                                                 |

### DME Gradability

How gradable is the image for DME? Note: This question doesn't show if "Other" was selected as the Fundus field. Also, "Gradable" and "Gradable with Difficulty" were both considered as gradable images.

|                          |                                                                                                                                                                                                                                                                                                                                                                                                                                                                                                                                      |
|--------------------------|--------------------------------------------------------------------------------------------------------------------------------------------------------------------------------------------------------------------------------------------------------------------------------------------------------------------------------------------------------------------------------------------------------------------------------------------------------------------------------------------------------------------------------------|
| Gradable                 | <ul style="list-style-type: none"> <li>Entire macula (one disc diameter from fovea center) can be seen clearly. A confident diagnosis can be made.</li> </ul>                                                                                                                                                                                                                                                                                                                                                                        |
| Gradable with Difficulty | <ul style="list-style-type: none"> <li>Entire macula can be seen, but the image quality is not good enough to make a confident diagnosis.</li> <li>Part of the macula is missing, but there's strong evidence of DME (e.g hard exudates) in the visible area</li> </ul>                                                                                                                                                                                                                                                              |
| Ungradable               | <ul style="list-style-type: none"> <li>Macula is not visible or only partially visible (less than one disc diameter from fovea center) either because it is not in the field of view or because it is occluded by artifacts, dark shadow etc. What can be seen is not enough to rule out DME.</li> <li>DR symptoms are not clear in the image (ungradable for any symptom of DR) then mark image as ungradable for DME even though hard exudates are visible. (As hard exudates may not be due to Diabetic macular Edema.</li> </ul> |

### Examples

Images that were ungradable for diabetic retinopathy by the deep learning system and adjudicators.

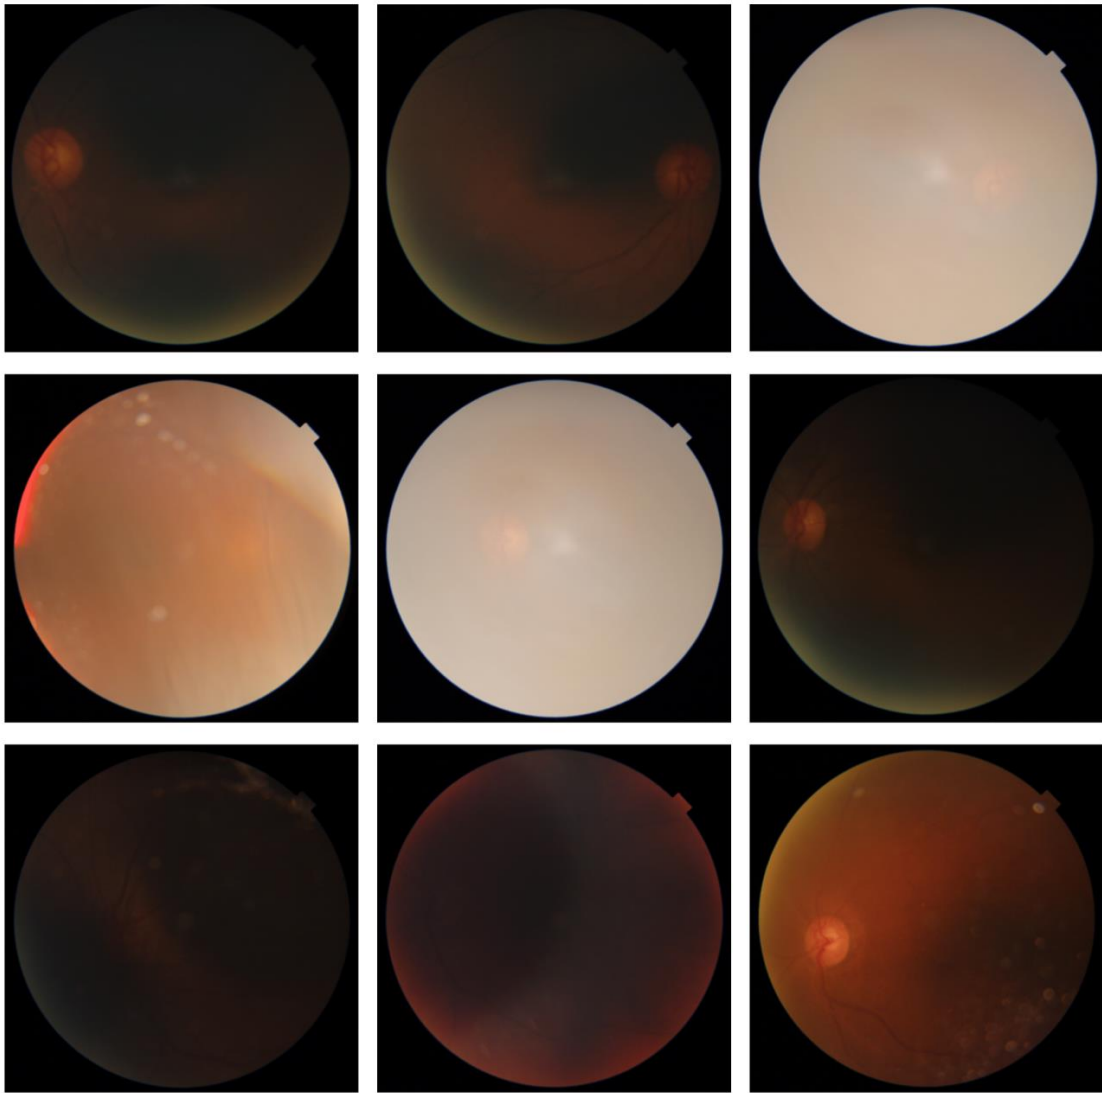

## Appendix C: Confusion Matrices

**DLS vs Reference - DR Confusion Matrix**

|           |             | DLS        |       |           |          |             |     | Total |
|-----------|-------------|------------|-------|-----------|----------|-------------|-----|-------|
|           |             | Ungradable | No DR | Mild NPDR | Mod NPDR | Severe NPDR | PDR |       |
| Reference | Ungradable  | 196        | 1     | 1         | 0        | 0           | 1   | 199   |
|           | No DR       | 73         | 914   | 66        | 28       | 0           | 10  | 1091  |
|           | Mild NPDR   | 0          | 1     | 25        | 13       | 0           | 0   | 39    |
|           | Mod NPDR    | 6          | 1     | 7         | 150      | 70          | 26  | 260   |
|           | Severe NPDR | 0          | 0     | 0         | 1        | 7           | 3   | 11    |
|           | PDR         | 2          | 0     | 0         | 1        | 0           | 79  | 82    |
| Total     |             | 277        | 917   | 99        | 193      | 77          | 119 | 1682  |

**Retina specialist vs Reference - DR Confusion Matrix**

|           |             | Retina specialist |       |           |          |             |     | Total |
|-----------|-------------|-------------------|-------|-----------|----------|-------------|-----|-------|
|           |             | Ungradable        | No DR | Mild NPDR | Mod NPDR | Severe NPDR | PDR |       |
| Reference | Ungradable  | 135               | 51    | 1         | 11       | 0           | 1   | 199   |
|           | No DR       | 5                 | 1047  | 18        | 20       | 1           | 0   | 1091  |
|           | Mild NPDR   | 1                 | 13    | 22        | 3        | 0           | 0   | 39    |
|           | Mod NPDR    | 4                 | 27    | 9         | 207      | 10          | 3   | 260   |
|           | Severe NPDR | 0                 | 0     | 0         | 8        | 3           | 0   | 11    |
|           | PDR         | 2                 | 5     | 1         | 10       | 1           | 63  | 82    |
| Total     |             | 147               | 1143  | 51        | 259      | 15          | 67  | 1682  |

**DLS vs Reference - DME Confusion Matrix**

|           |            | DLS        |        |     | Total |
|-----------|------------|------------|--------|-----|-------|
|           |            | Ungradable | No DME | DME |       |
| Reference | Ungradable | 194        | 82     | 15  | 291   |
|           | No DME     | 7          | 1154   | 68  | 1229  |
|           | DME        | 1          | 7      | 154 | 162   |
| Total     |            | 202        | 1243   | 237 | 1682  |

**Retina specialist vs Reference - DME Confusion Matrix**

|           |            | Retina specialist |        |     | Total |
|-----------|------------|-------------------|--------|-----|-------|
|           |            | Ungradable        | No DME | DME |       |
| Reference | Ungradable | 153               | 130    | 8   | 291   |
|           | No DME     | 8                 | 1192   | 29  | 1229  |
|           | DME        | 4                 | 24     | 134 | 162   |
| Total     |            | 165               | 1346   | 171 | 1682  |

**DLS vs Reference - mtmDR Confusion Matrix**

|           |            | DLS        |          |       | Total |
|-----------|------------|------------|----------|-------|-------|
|           |            | Ungradable | No mtmDR | mtmDR |       |
| Reference | Ungradable | 231        | 32       | 6     | 269   |
|           | No mtmDR   | 35         | 972      | 53    | 1060  |
|           | mtmDR      | 7          | 7        | 339   | 353   |
| Total     |            | 273        | 1011     | 398   | 1682  |

**Retina specialist vs Reference - mtmDR Confusion Matrix**

|           |            | Retina specialist |          |       | Total |
|-----------|------------|-------------------|----------|-------|-------|
|           |            | Ungradable        | No mtmDR | mtmDR |       |
| Reference | Ungradable | 137               | 118      | 14    | 269   |
|           | No mtmDR   | 4                 | 1034     | 22    | 1060  |
|           | mtmDR      | 6                 | 42       | 305   | 353   |
| Total     |            | 147               | 1194     | 341   | 1682  |

**DLS vs Reference - vtDR Confusion Matrix**

|           |            | DLS        |         |      | Total |
|-----------|------------|------------|---------|------|-------|
|           |            | Ungradable | No vtDR | vtDR |       |
| Reference | Ungradable | 233        | 35      | 7    | 275   |
|           | No vtDR    | 36         | 1097    | 53   | 1186  |
|           | vtDR       | 4          | 8       | 209  | 221   |
| Total     |            | 273        | 1140    | 269  | 1682  |

**Retina specialist vs Reference - vtDR Confusion Matrix**

|           |            | Retina specialist |         |      | Total |
|-----------|------------|-------------------|---------|------|-------|
|           |            | Ungradable        | No vtDR | vtDR |       |
| Reference | Ungradable | 141               | 125     | 9    | 275   |
|           | No vtDR    | 7                 | 1160    | 19   | 1186  |
|           | vtDR       | 6                 | 34      | 181  | 221   |
| Total     |            | 154               | 1319    | 209  | 1682  |

**DLS vs Reference – All-cause referable DR**

Count

|           |               | DLS           |           | Total |
|-----------|---------------|---------------|-----------|-------|
|           |               | Non-referable | Referable |       |
| Reference | Non-referable | 972           | 88        | 1060  |
|           | Referable     | 39            | 583       | 622   |
| Total     |               | 1011          | 671       | 1682  |

**Retina specialist vs Reference – All-cause referable DR**

Count

|           |               | Retina specialist |           | Total |
|-----------|---------------|-------------------|-----------|-------|
|           |               | Non-referable     | Referable |       |
| Reference | Non-referable | 1034              | 26        | 1060  |
|           | Referable     | 160               | 462       | 622   |
| Total     |               | 1194              | 488       | 1682  |

Note: Slight discrepancies exist when comparing matrices with Figure 1 and Table 2. Discrepancies arise due to the need to exclude images ungradable by any one of the reference, DLS, or retina specialist when performing pairwise statistical testing.
